# Supplementary material
Source: PubMed Central journal article supplement (PMC3616451)
Supplement: Supp_Table1.pdf [file Supp_Table1.pdf]

## Supplementary Data

SUPPLEMENTARY TABLE S1. LIST OF QRT-PCR PRIMER SEQUENCES USED IN THIS STUDY

| <i>Gene</i>  | <i>Sequence of forward primer</i> | <i>Sequence of reverse primer</i> |
|--------------|-----------------------------------|-----------------------------------|
| <i>Oct4</i>  | 5'-CCAATGCCGTGAAGTTGGA-3'         | 5'-GCTCCTTCTGCAGGCTTT-3'          |
| <i>Nanog</i> | 5'-CCTCCATTCTGAACCTGAGCT-3'       | 5'-CGCTTGCACTTCATCCTTTG-3'        |
| <i>Nes</i>   | 5'-CCCTTAGTCTGGAAGTGGCTA-3'       | 5'-TGTCTGAAGCGAGAGTTCTC-3'        |
| <i>Neto2</i> | 5'-GCAGTTGATTGCATATGGACA-3'       | 5'-TTCATTTGAGTGTTCCATTGG-3'       |
| <i>Actb</i>  | 5'-GTGAAAAGATGACCCAGATCA-3'       | 5'-GTGAAAAGATGACCCAGATCA-3'       |
