# Supplementary material
Source: PubMed Central journal article supplement (PMC3616451)
Supplement: Supp_Table2.pdf [file Supp_Table2.pdf]

SUPPLEMENTARY TABLE S2. LIST OF PCR PRIMER SEQUENCES USED IN THIS STUDY

| <i>Gene</i>     | <i>Sequence of forward primer</i> | <i>Sequence of reverse primer</i> |
|-----------------|-----------------------------------|-----------------------------------|
| <i>Oct4</i>     | 5'-CCAATGCCGTGAAGTTGGA-3'         | 5'-GCTCCTTCTGCAGGCTTT-3'          |
| <i>Nanog</i>    | 5'-CCTCCATTCTGAACCTGAGCT-3'       | 5'-CGCTTGCACTTCATCCTTTG-3'        |
| <i>Nes</i>      | 5'-AGCAGGAGAAGCAGGGTC-3'          | 5'-CTGGGAACTTCTTCCAGG-3'          |
| <i>Neto2</i>    | 5'-GCCAAGCAGTTGATTGCA-3'          | 5'-TTGGCCTTCAGATTTTCG-3'          |
| <i>H2Afy1.1</i> | 5'-CTTTGAGGTGGAGGCCATAA-3'        | 5'-GAGCCAAGCAGTTTTTCACC-3'        |
| <i>Hbb-bh1</i>  | 5'-AGCTGAGGAGAAGGCAGCTA-3'        | 5'-GGTCTCCTTGAGGTTGTCCA-3'        |
| <i>Myh6</i>     | 5'-ATGTTAAGGCCAAGGTCGTG-3'        | 5'-ACGCAGAAGAGGCCTGAGTA-3'        |
| <i>Sox17</i>    | 5'-GGAGGGTCACCACTGCTTTA-3'        | 5'-AGATGTCTGGAGGTGCTGCT-3'        |
| <i>Vim</i>      | 5'-CCTGTACGAGGAGGAGATGC-3'        | 5'-GTGCCAGAGAAGCATTGTCA-3'        |
| <i>Lmna(1)</i>  | 5'-CCGCAAGACCCTTGATTC-3'          | 5'-TCCCCCTCCTTCTTGGTG-3'          |
| <i>Lmna (2)</i> | 5'-GCCCCGAAGACCCTTGA-3'           | 5'-CCTGCGCAGCCAACAAGT-3'          |
| <i>Gapdh</i>    | 5'-GTGAAAAGATGACCCAGATCA-3'       | 5'-GTGAAAAGATGACCCAGATCA-3'       |
